# Supplementary material for: In Vitro and In Vivo Toxicity Evaluation of Natural Products with Potential Applications as Biopesticides
Source: MDPI journal article supplement (doi:10.3390/toxins13110805), 2021-11-15
Supplement: s1 [file s1]

Supplementary Information

# In Vitro and In Vivo Toxicity Evaluation of Natural Products with Potential Applications as Biopesticides

Felicia Sangermano <sup>1</sup>, Marco Masi <sup>2,\*</sup>, Amrish Kumar <sup>3</sup>, Ravindra Peravali <sup>3</sup>, Angela Tuzi <sup>2</sup>, Alessio Cimmino <sup>2</sup>, Daniela Vallone <sup>3</sup>, Giuliana Giamundo <sup>4</sup>, Ivan Conte <sup>1,4</sup>, Antonio Evidente <sup>2</sup> and Viola Calabrò <sup>1,\*</sup>

<sup>1</sup> Department of Biology, University of Naples Federico II, Complesso Universitario Monte Sant' Angelo, Via Cintia 4, 80126 Naples, Italy; felicia.sangermano@unina.it (F.S.), ivan.conte@unina.it (I.C.)

<sup>2</sup> Department of Chemical Sciences, University of Naples Federico II, Complesso Universitario Monte Sant' Angelo, Via Cintia 4, 80126 Naples, Italy; angela.tuzi@unina.it (A.T.), alessio.cimmino@unina.it (A.C.), evidente@unina.it (A.E.)

<sup>3</sup> Institute for Biological and Chemical Systems-Biological Information Processing (IBCS-BIP), Karlsruhe Institute of Technology, Hermann-von-Helmholtz-Platz 1, 76344 Eggenstein-Leopoldshafen, Germany; amrish.kumar9@kit.edu (A.K.), ravindra.peravali@kit.edu (R.P.), daniela.vallone@kit.edu (D.V.)

<sup>4</sup> Telethon Institute of Genetics and Medicine, Via Campi Flegrei 34, 80078 Pozzuoli, Italy; g.giamundo@tigem.it

\* Correspondence: marco.masi@unina.it (M.M.); vcalabro@unina.it (V.C.)

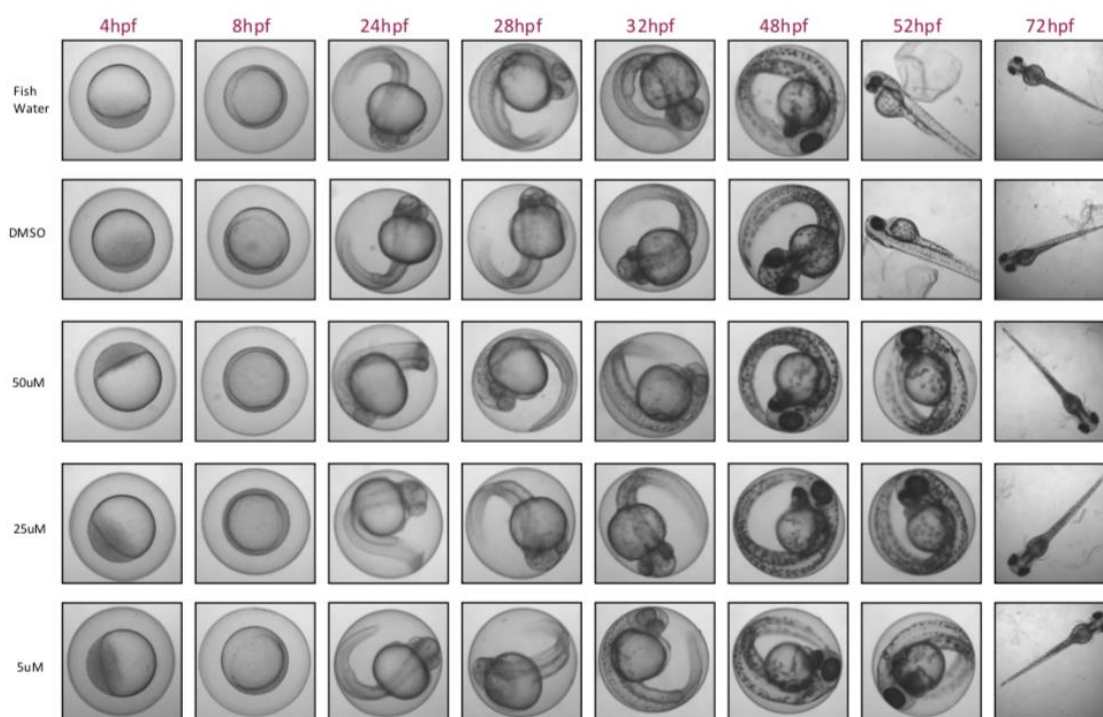

**Figure S1.** A representative panel showing normal development of *Danio rerio* treated with 5, 25 and 50  $\mu$ M cavoxin for the indicated times, up to 72 hps in comparison with the control (DMSO (dimethyl sulfoxide) 0.5%).

**Table S1.** Cytotoxicity data of the ten selected compounds (50  $\mu$ M) in mammalian cells at 72h of treatment .

| Compound                  | Cell viability % |        |        |        |
|---------------------------|------------------|--------|--------|--------|
|                           | Hacat            | A431   | NIH3T3 | SVT2   |
| Negative control*         | 100              | 100    | 100    | 100    |
| Cavoxin (1)               | 106.05           | 97.16  | 101.00 | 98.00  |
| $\alpha$ -Costic acid (2) | 140.00           | 95.00  | 103.00 | 101.00 |
| Cyclopaldic acid (3)      | 110.02           | 98.07  | 56.03  | 50.00  |
| <i>epi</i> -Epoformin (4) | 105.00           | 101.23 | 94.98  | 103.00 |
| Inuloxin A (5)            | 99.01            | 103.04 | 99.07  | 97.80  |
| Inuloxin C (6)            | 107.00           | 111.13 | 101.08 | 104.13 |
| Papyracillic acid (7)     | 103.17           | 98.00  | 95.00  | 98.05  |
| Seiridin (8)              | 98.00            | 97.00  | 97.16  | 97.02  |
| Sphaeropsidone (9)        | 110.01           | 98.03  | 103.45 | 106.05 |
| Ungeremine (10)           | 107.34           | 103.33 | 110.32 | 99.18  |

\*DMSO addition alone.
